# Supplementary material for: LIM Protein Ajuba associates with the RPA complex through direct cell cycle-dependent interaction with the RPA70 subunit
Source: PubMed Central journal article supplement (PMC6015067; doi:10.1038/s41598-018-27919-8), 2018-06-22
Supplement: 41598_2018_27919_MOESM1_ESM.pdf [file 41598_2018_27919_MOESM1_ESM.pdf]

**Supplementary information**

1  
2  
3  
4  
5  
6  
7  
8  
9  
10  
11  
12  
13  
14  
15  
16  
17  
18  
19  
20  
21  
22  
23

**LIM Protein Ajuba associates with the RPA complex through direct cell cycle-dependent interaction with the RPA70 subunit**

**Sandy Fowler, Pascal Maguin, Sampada Kalan and Diego Loayza**

24 **Supplementary Figures:**

25

26 **Figure S1.** Ajuba-RPA70 interaction is reduced during replication stress. IP-  
27 Western from total extracts in unsynchronized HTC75 (left) and IMR90 (right)  
28 cells. Cells were untreated and treated with 2mM HU for 24 hours (+2mM HU).  
29 The \* denotes a non-specific band.

30 **Figure S2.** Ajuba protein levels do not change during hydroxyurea treatment.  
31 HTC75 cells were treated with 2mM HU for 3, 6, and 24 hours and processed for  
32 protein extraction and Western blotting.

33 **Figure S3.** Flow cytometry for propidium iodide content of HTC75 cells (see  
34 Figure 1C) and IMR90 cells (see Figure S4). Cells were untreated (UT), treated  
35 with 2mM HU for 24 hours (24 hr HU), and synchronized to S phase by double  
36 thymidine block and release for 2 hours (dT 2hr) or 4.5 hours (dT 4hr).

37 **Figure S4.** Ajuba-RPA32 interaction is reduced during replication stress but not  
38 in S phase cells. IMR90 cells were untreated, treated with 2mM HU for 24 hours  
39 (24 hr 2mM HU), or synchronized to S phase by double thymidine block and  
40 released for 4.5 hours (double thymidine S phase).

41 **Figure S5.** Ajuba-RPA70 nuclear co-localization is increased by Leptomycin B  
42 treatment (10uM). A) Co-immunofluorescence of Ajuba and RPA70 in  
43 unsynchronized HTC75 and IMR90 cells. Arrowheads point to sites of co-  
44 localization B) Quantification of cells that exhibited >3 foci of Ajuba-RPA70 co-  
45 localization in untreated and leptomycin B treated HTC75 cells (n=100 cells, on 3  
46 independent experiments).

47 **Figure S6.** A) Ajuba displays significant co-localization with PCNA. Co-  
48 immunofluorescence of Ajuba and PCNA in unsynchronized and synchronized  
49 (double thymidine block and release) HTC75 cells. B) Ajuba displays significant  
50 co-localization with BrdU in a subset of BrdU-positive cells. A culture of  
51 asynchronous HTC75 cells was pulsed with BrdU for 1 hour and processed for  
52 BrdU and Ajuba co-immunofluorescence.

53 **Figure S7.** A) Ajuba does not directly interact with POT1. Binding experiment of  
54 full-length His-Ajuba and co-translated full-length POT1 followed by  
55 autoradiography. B) Binding experiment between co-translated RPA70 OB folds  
56 B-C and full-length Ajuba-His followed by autoradiography.

57 **Figure S8.** LIM domain 1 of Ajuba and OB fold A of RPA70 mediate the direct  
58 interaction between the two proteins. Schematic of Ajuba and RPA70, arrows  
59 pointing up represent the positions used to generate truncation mutants.

60 **Figures S9-S13.** Full-length blots and scans showed in the main figures. A  
61 dashed red box within each blot or scan indicates the approximate areas used to  
62 produce the panels shown in the main figures.

63

64

65

**Supplementary figures.**

**Figure S1.**

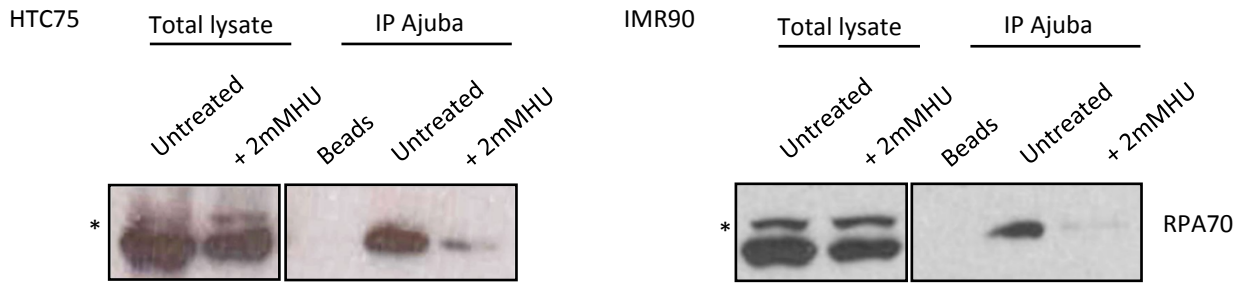

**Figure S2.**

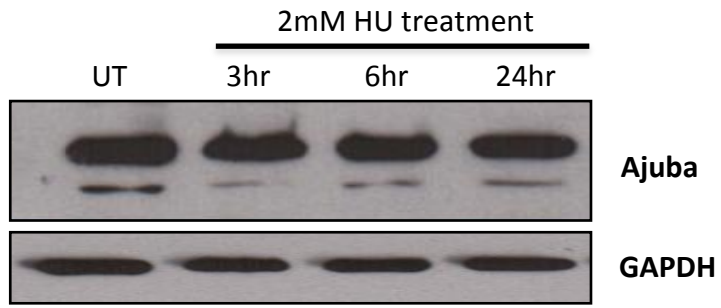

**Figure S3.**

| HTC75 | UT  | 24hr HU | dT 2hr | IMR90 | UT  | 24hr HU | dT 4.5hr |
|-------|-----|---------|--------|-------|-----|---------|----------|
| G1    | 64% | 58.85%  | 22.1%  | G1    | 63% | 55.5%   | 20%      |
| S     | 24% | 41.14%  | 76.7%  | S     | 8%  | 44%     | 73%      |
| G2/M  | 11% | 0%      | 1.62%  | G2/M  | 29% | 0%      | 4%       |

**Figure S4.**

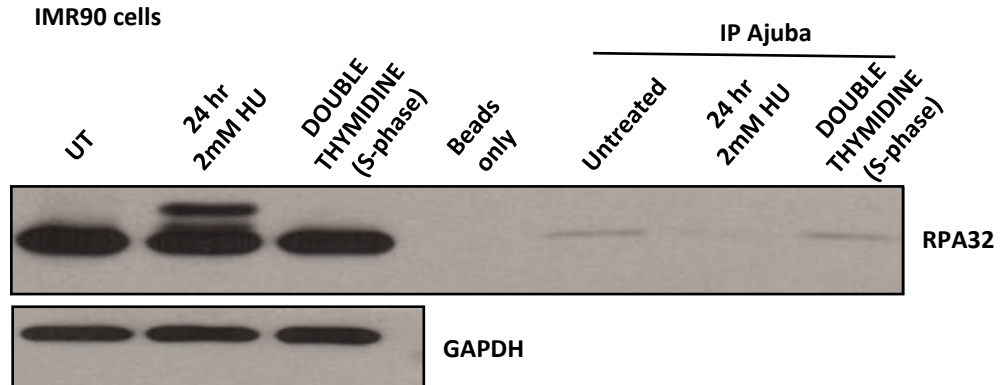

**Figure S5.**

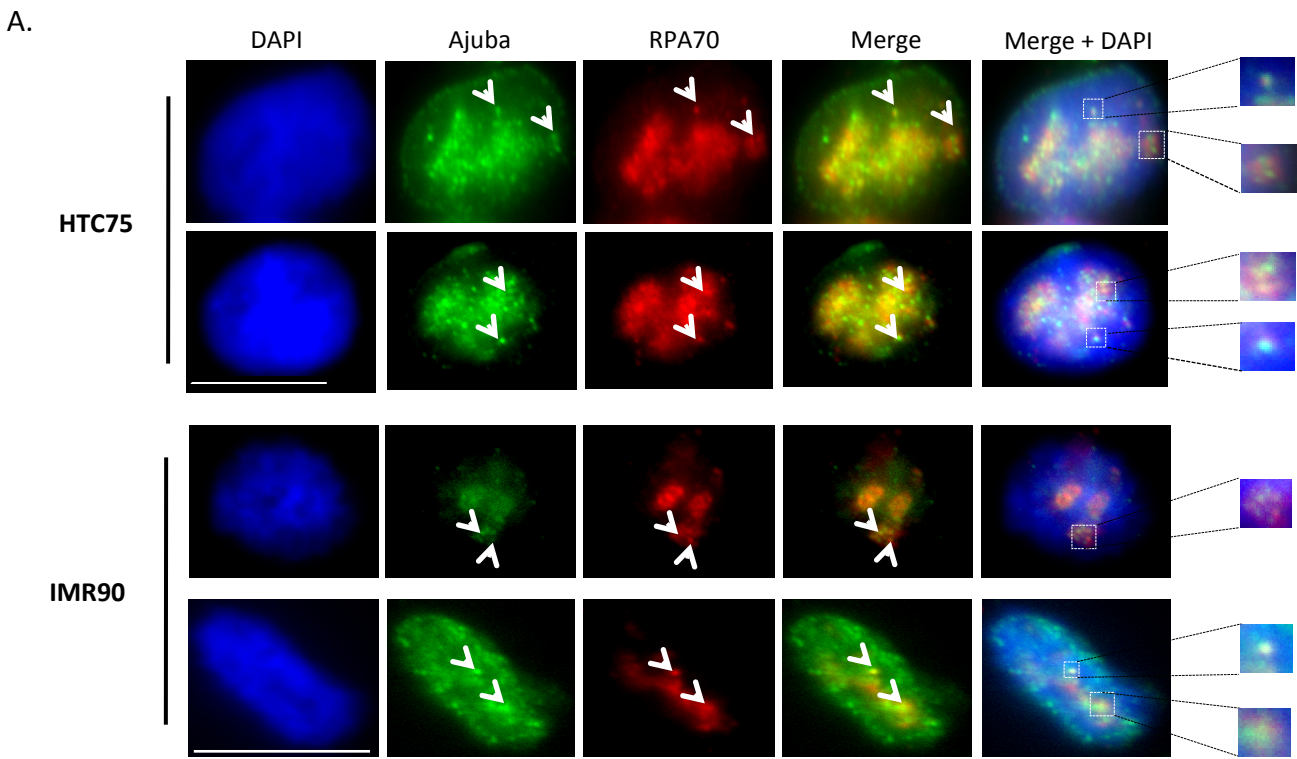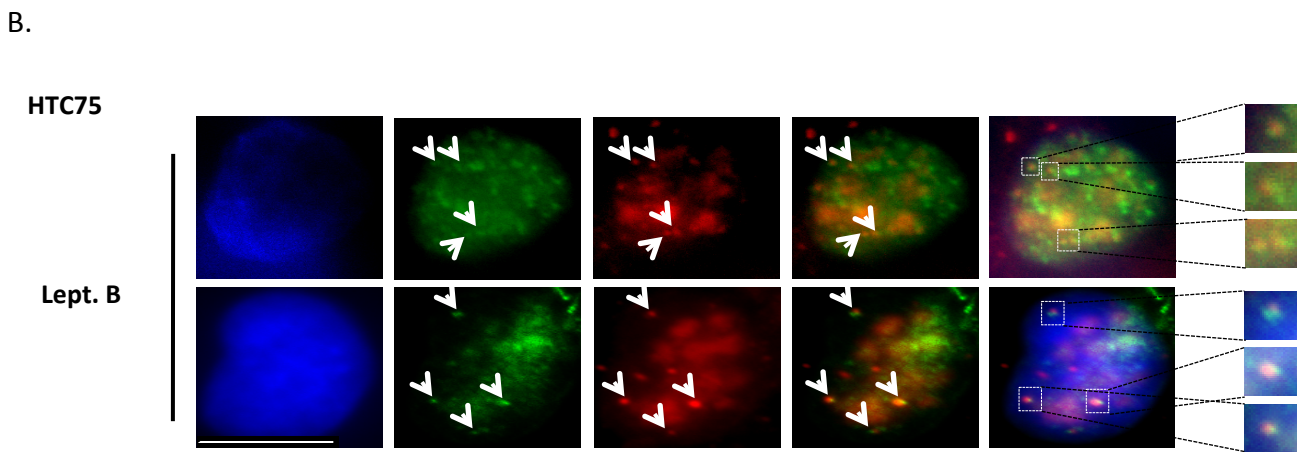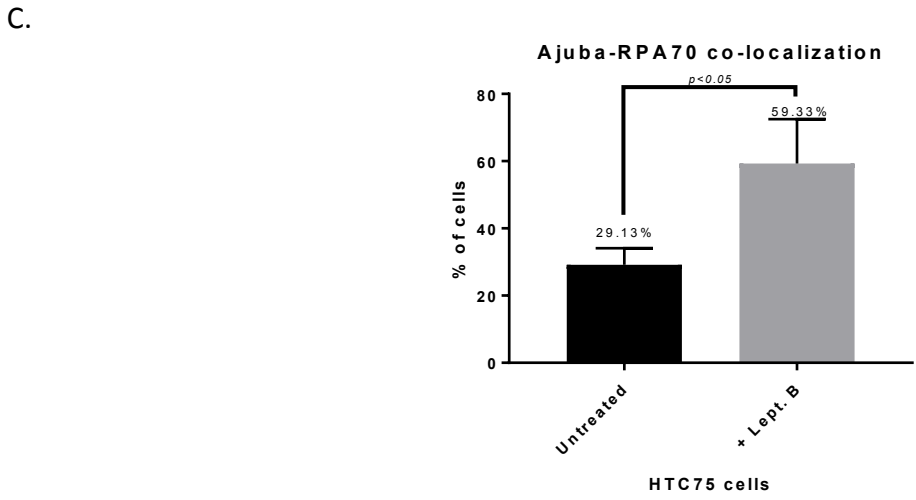

Figure S6.

A.

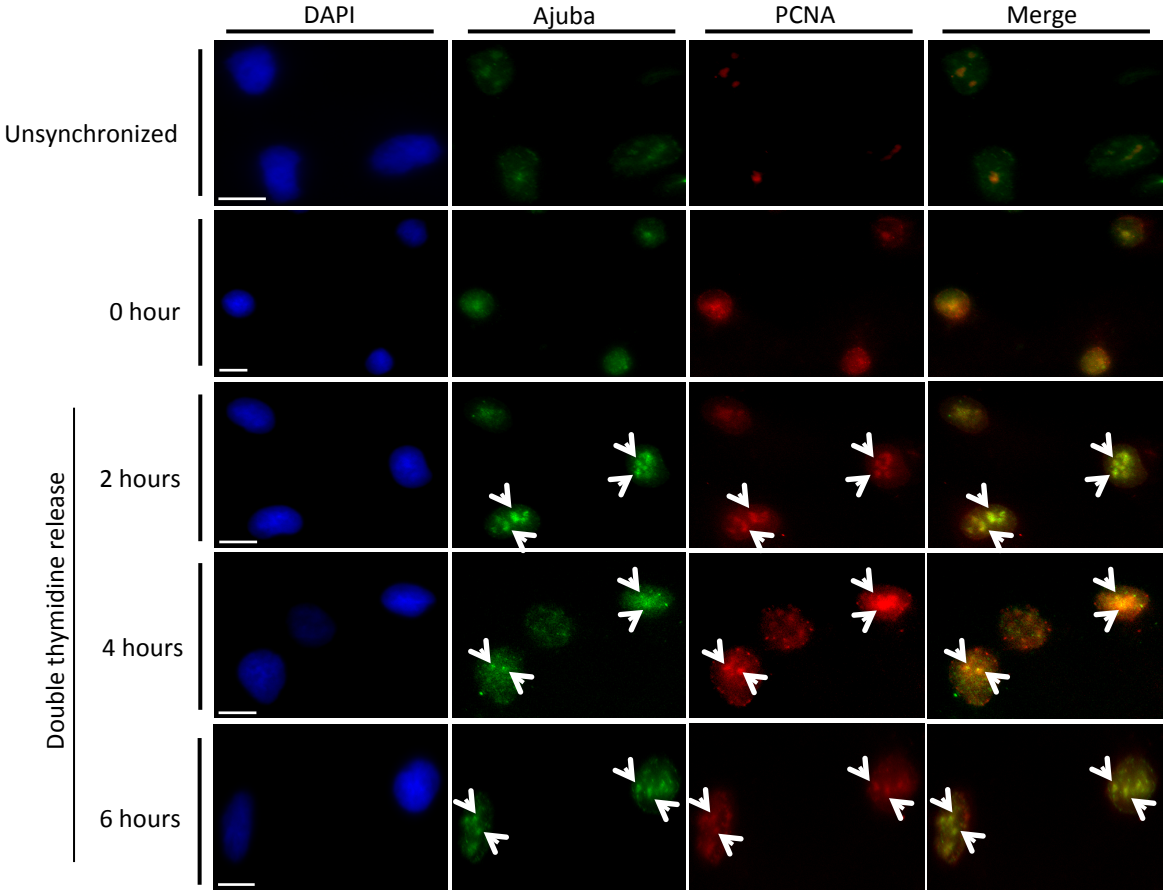

B.

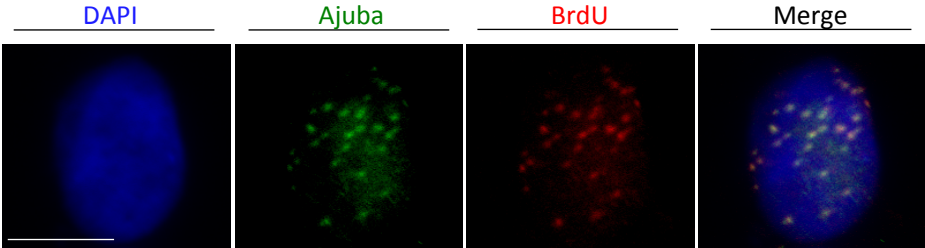

Figure S7.

A.

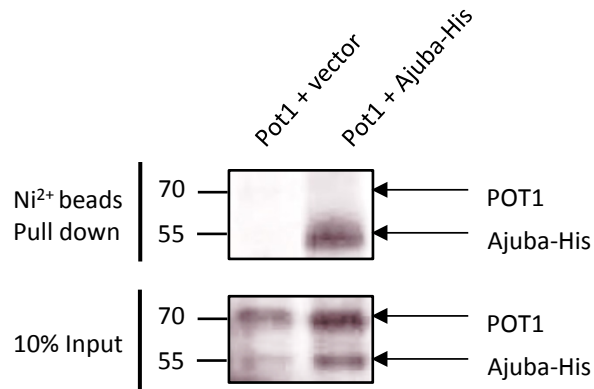

B.

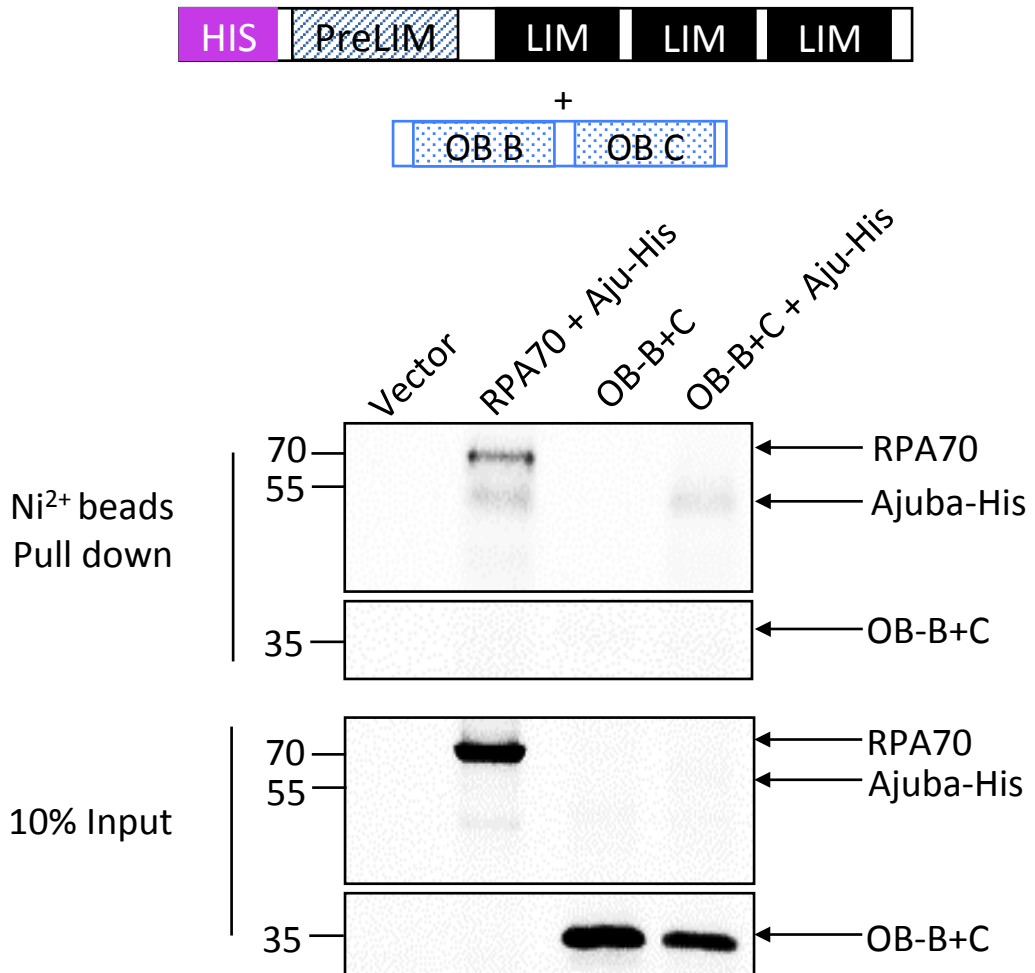

Figure S8.

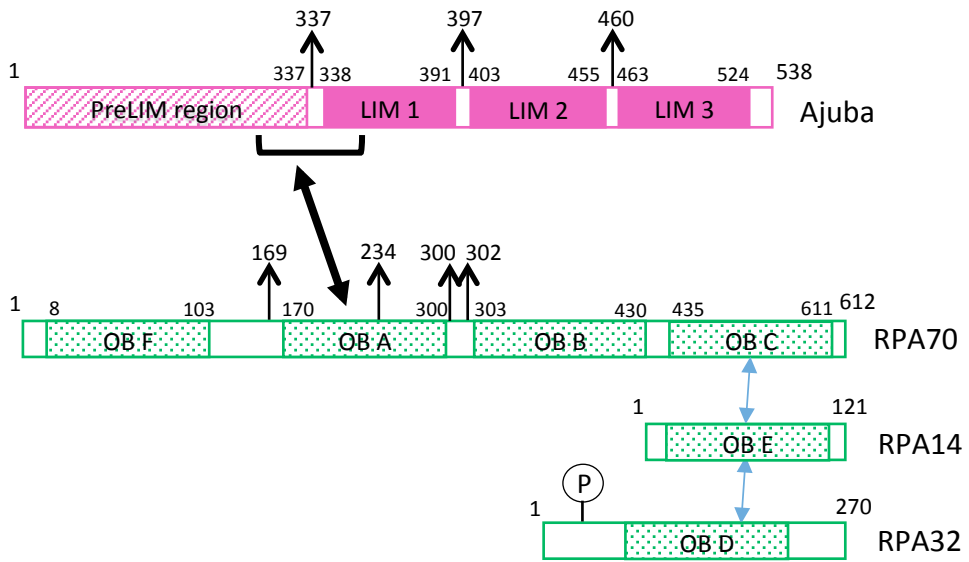



Figure S9.

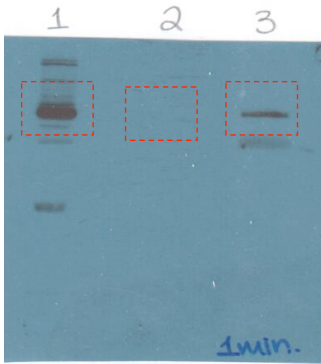

Fig. 1A (top)

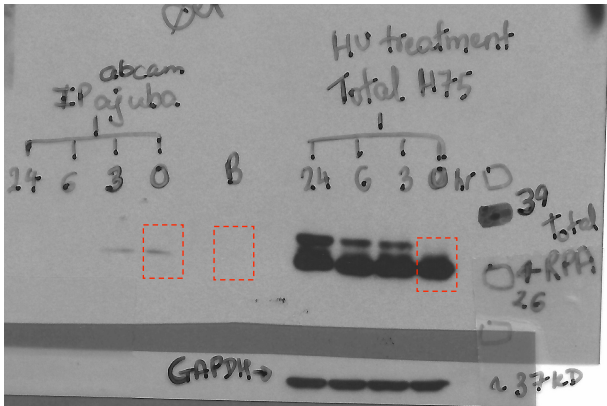

Fig. 1A (bottom)

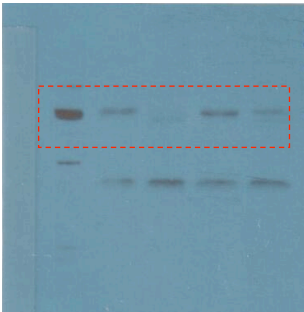

Fig. 1B

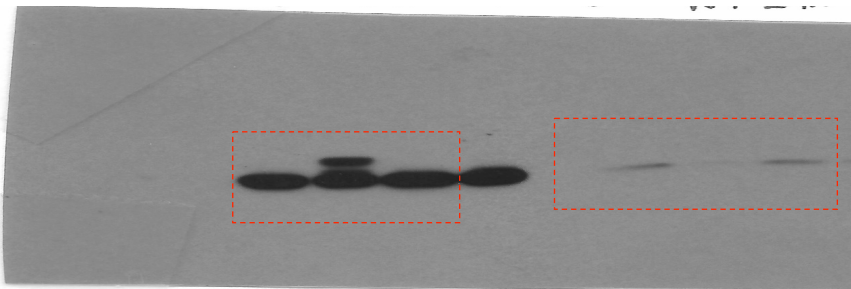

Fig. 1C

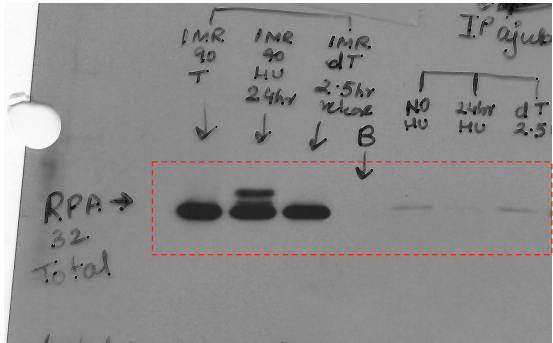

Fig. S2

**Figure S10.**

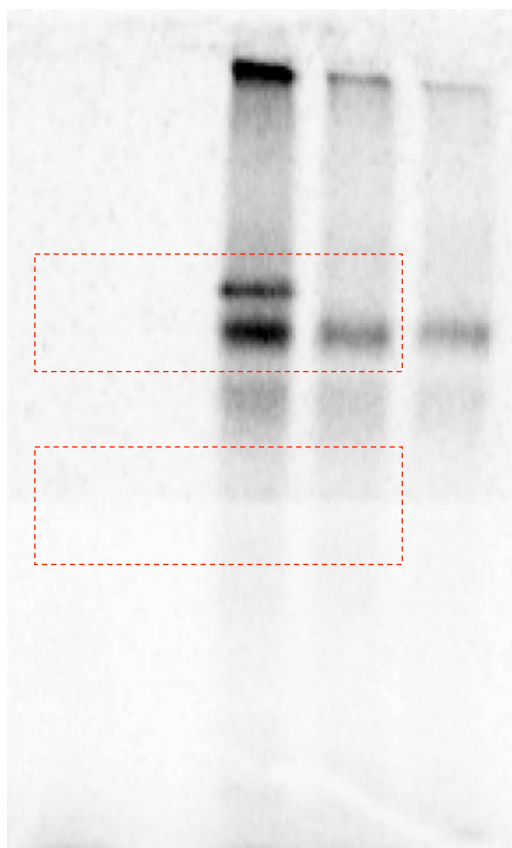

**Fig5A (top)**

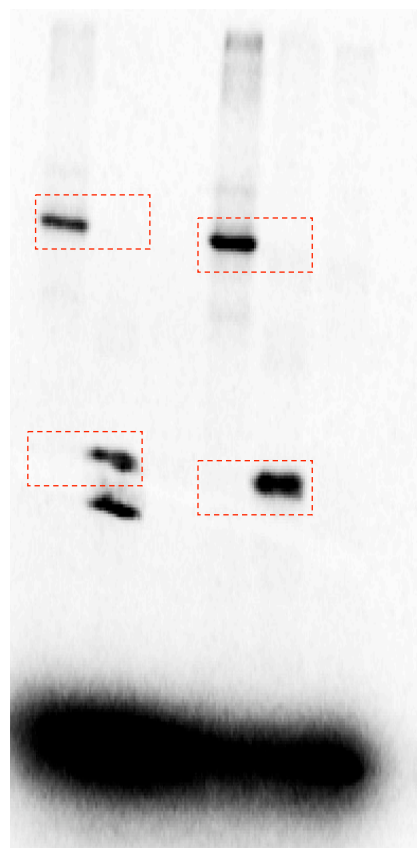

**Fig5A (bottom)**

**Figure S11.**

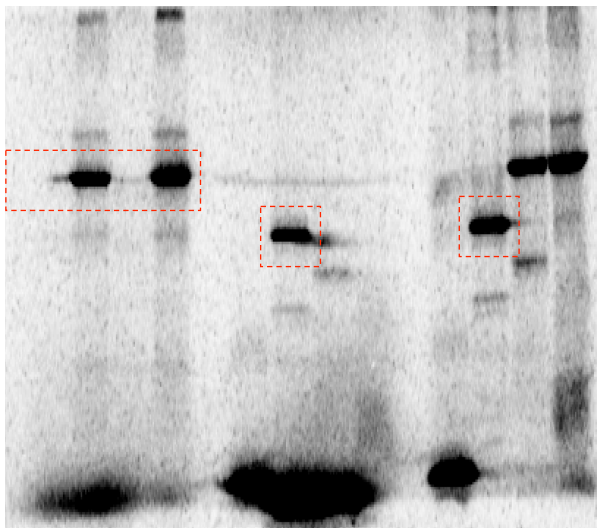

**Fig.6A (bottom)**

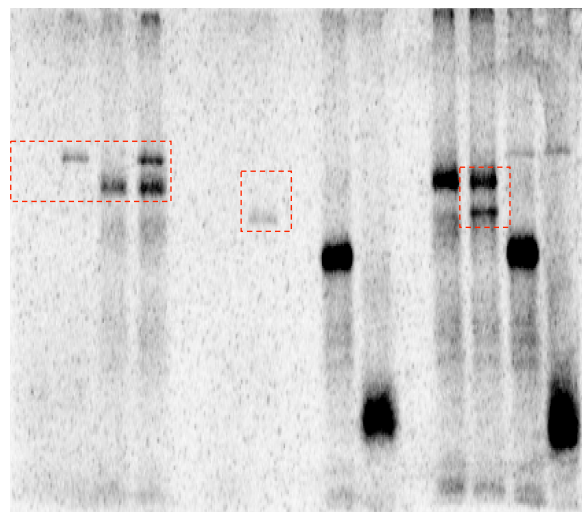

**Fig.6A (top)**

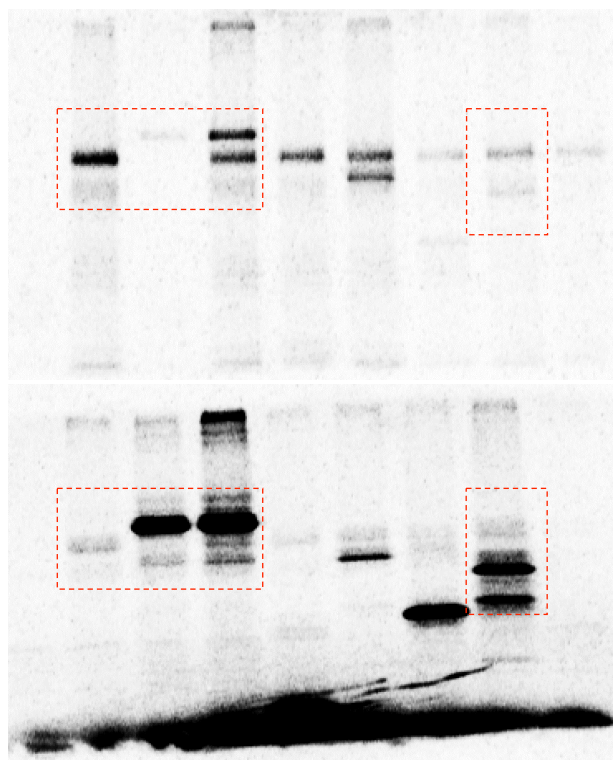

**Fig.6B**

Figure S12.

# Ni<sup>2+</sup> pulldown

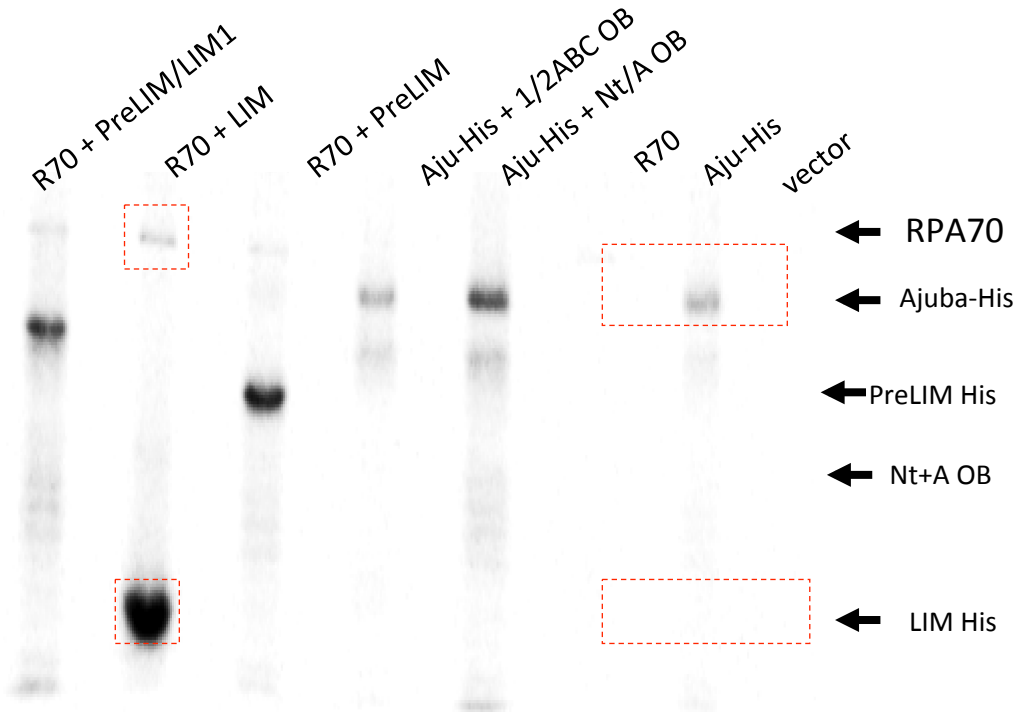

Fig.6C (top)

# 10% input

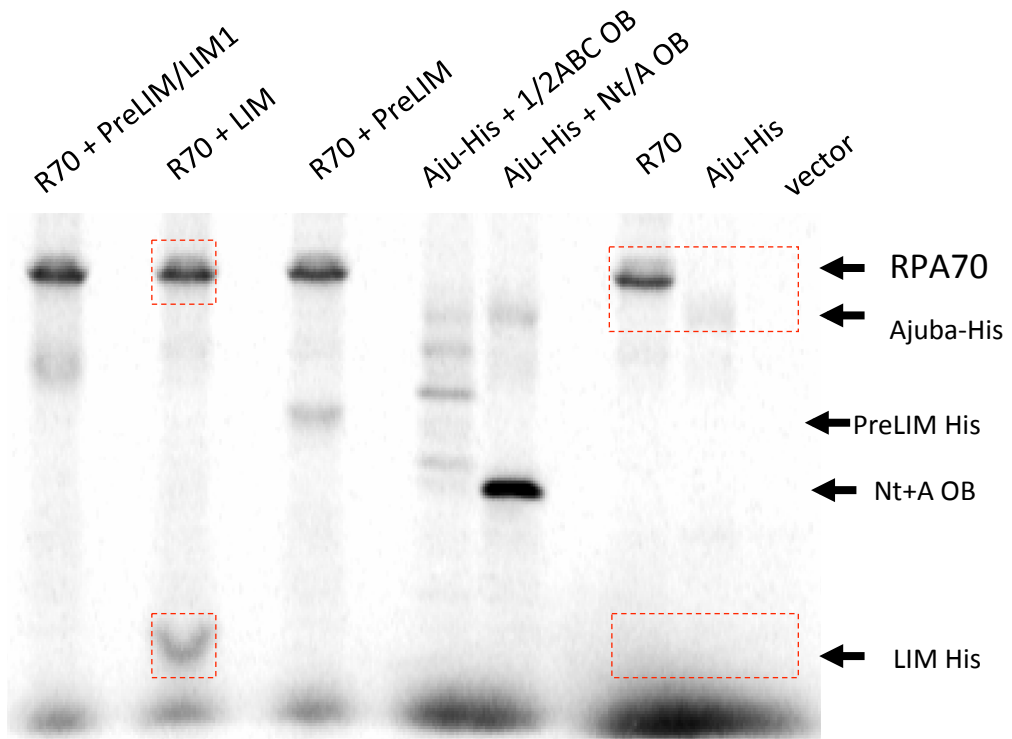

Fig.6C (bottom)

**Figure S13.**

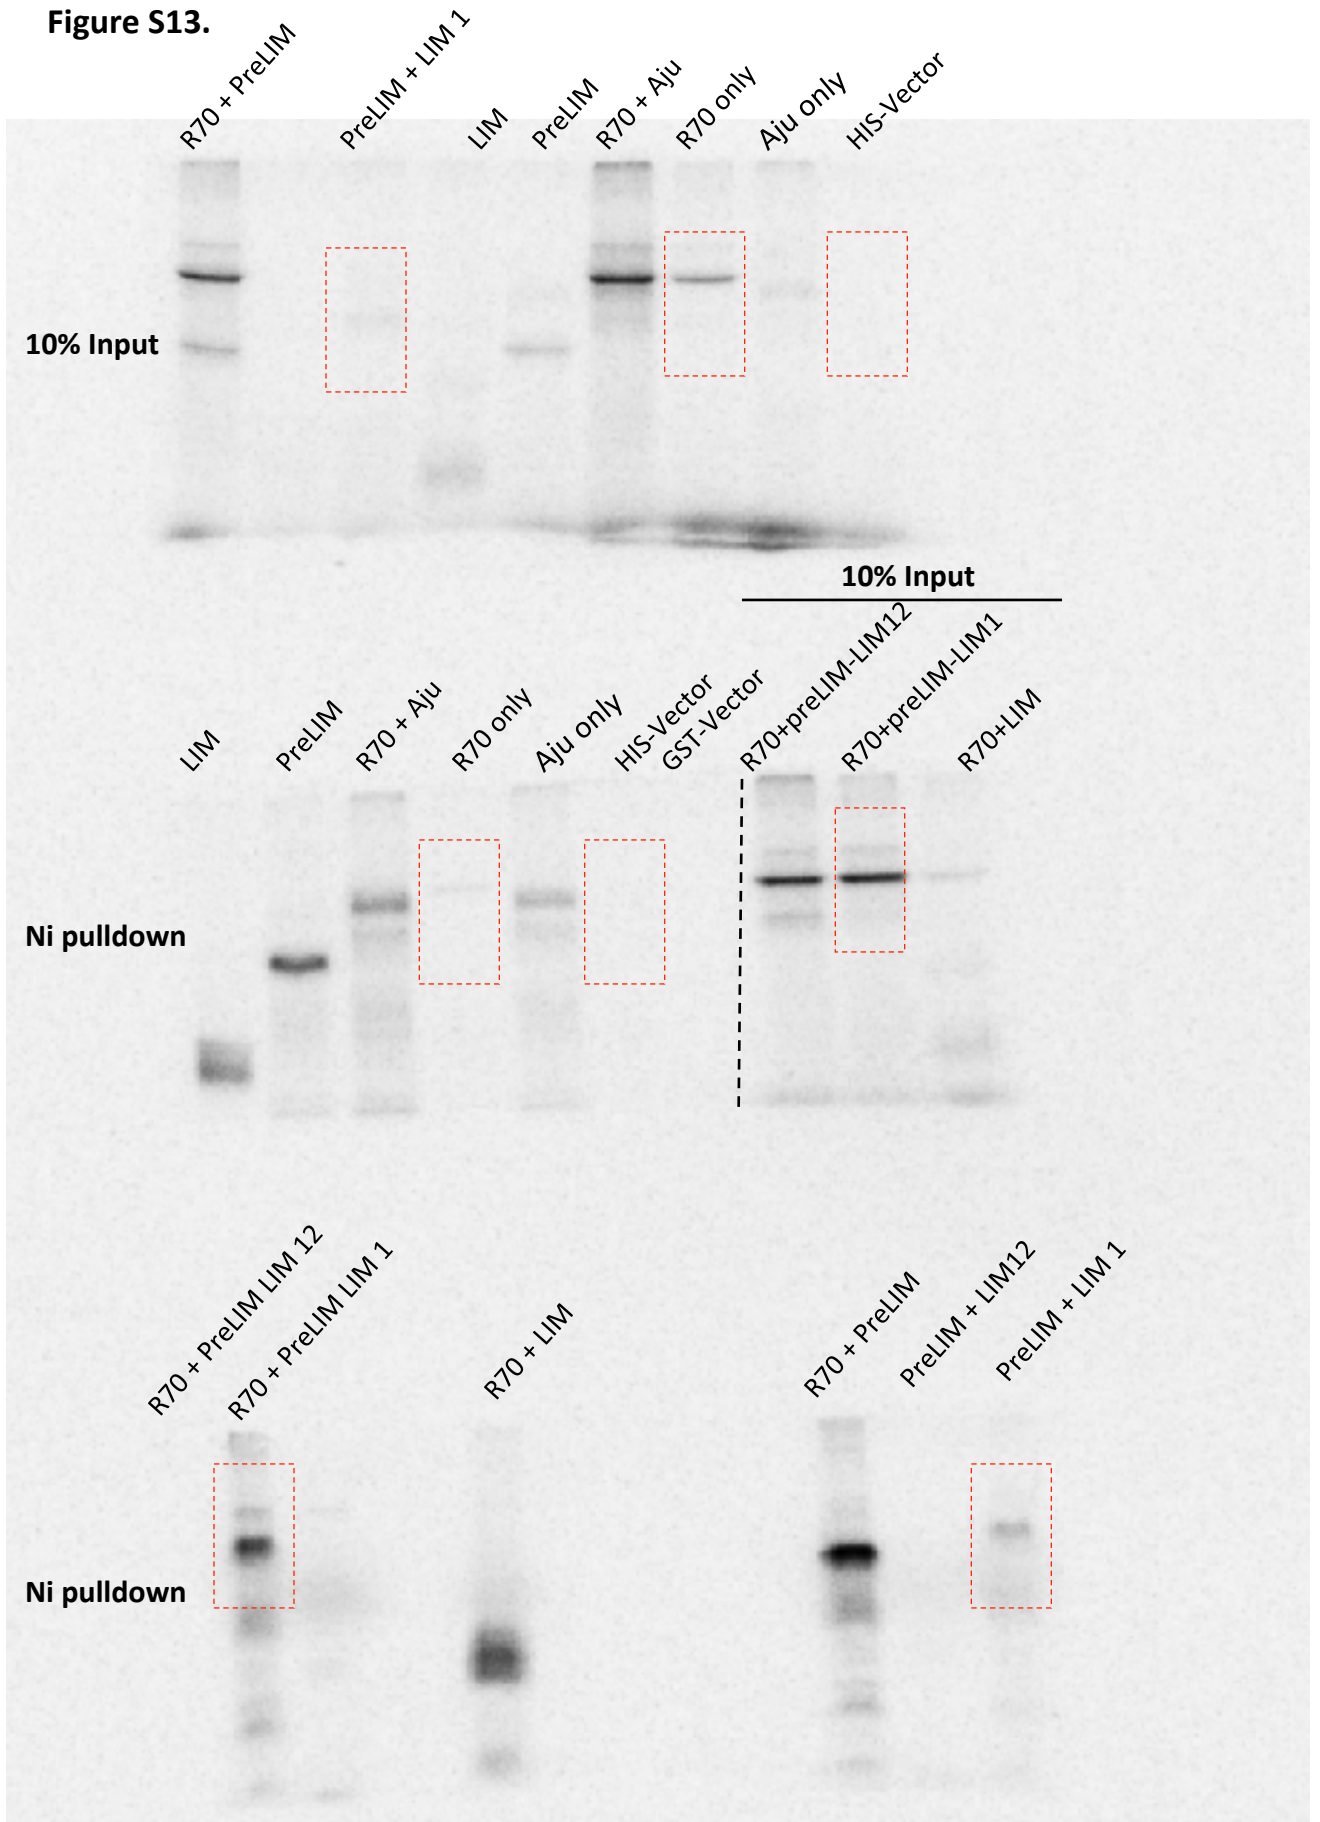

**Fig.6D**
